# Luminosity thresholds of colored surfaces are determined by their heuristic upper-limit luminances in the visual system

Takuma Morimoto<sup>1\*</sup>, Ai Numata<sup>2</sup>, Kazuho Fukuda<sup>3</sup> and Keiji Uchikawa<sup>4</sup>

1: Department of Experimental Psychology, University of Oxford, Oxford, UK

2: Department of Information Processing, Tokyo Institute of Technology, Yokohama, Japan

3: Department of Information Design, Kogakuin University, Tokyo, Japan

4: Human Media Research Center, Kanagawa Institute of Technology, Atsugi, Japan

\*Corresponding author: [takuma.morimoto@psy.ox.ac.uk](mailto:takuma.morimoto@psy.ox.ac.uk)

Address: New Radcliffe House, Radcliffe Observatory Quarter, Woodstock Road, Oxford OX2  
6GG

Keywords: Luminosity threshold, Color vision, Optimal color

## Abstract

Some objects in the real world themselves emit a light, and we typically have a fairly good idea as to whether a given object is self-luminous or illuminated by a light source. However, it is not well understood how our visual system makes this judgement. This study aimed to identify determinants of luminosity threshold, a luminance level at which the surface begins to appear self-luminous. We specifically tested a hypothesis that our visual system knows a maximum luminance level that a surface can reach under the physical constraint that surface cannot reflect more lights than incident lights and apply this prior to determine the luminosity thresholds. Observers were presented a 2-degree circular test field surrounded by numerous overlapping color circles, and luminosity thresholds were measured as a function of (i) the chromaticity of the test field, (ii) the shape of surrounding color distribution and (iii) the color of illuminant lighting surrounding colors. We found that the luminosity thresholds strongly depended on test chromaticity

30 and peaked around the chromaticity of test illuminants and decreased as the purity of  
31 the test chromaticity increased. However, the locus of luminosity thresholds over  
32 chromaticities were nearly invariant regardless of the shape of surrounding color  
33 distribution and generally well resembled the locus drawn from theoretical upper-limit  
34 luminance but also the locus drawn from the upper boundary of real objects. These  
35 trends were particularly evident for test illuminants on blue-yellow axis and curiously did  
36 not hold under atypical illuminants such as magenta or green. Based on these results,  
37 we propose a theory that our visual system empirically internalizes the gamut of surface  
38 colors under illuminants typically found in natural environments and a given surface  
39 appears self-luminous when its luminance exceeds this heuristic upper-limit luminance.

40

## 41 **1. Introduction**

42 Most objects in the real world are visible because they reflect a light. Some objects  
43 however themselves emit a light and such self-luminous objects typically have a distinct  
44 appearance (e.g. traffic lights visually stand out in a scene). However, any light reaching  
45 our retina is indiscriminately encoded by three classes of cone signals regardless of  
46 whether the light is reflected from a surface or directly emitted from a light source. Thus,  
47 judging whether a given object is self-luminous presents an mathematically  
48 underdetermined problem to the visual system. The goal of this study is to reveal how  
49 our visual system overcomes this computational challenge and generates the luminous  
50 percept.

51

52 Self-luminous objects normally have a glowing appearance which is distinct from the  
53 appearance of an illuminated surfaces. This qualitative difference was formally

54 introduced as a mode of color appearance (Katz, 1935). The original description finely  
55 discriminates various categories, but this study concerns two modes: surface-color mode  
56 and aperture-color mode, which respectively correspond to the qualities of color  
57 appearance for an illuminated surface and a self-luminous object. The color appearance  
58 was mostly studied in the surface-color mode, and only a limited number of studies  
59 investigated the nature of the aperture-color mode (e.g. Uchikawa, Uchikawa & Boynton,  
60 1989).

61

62 One common approach is to measure the transition luminance between the surface-  
63 color mode and the aperture-color mode which is known as *luminosity threshold*. Past  
64 studies investigated what factors might govern the threshold. In early study, Ullman  
65 (1976) extensively discussed potential determinants of luminosity thresholds: highest  
66 intensity in a scene, absolute intensity of stimulus, local or global contrast, intensity  
67 comparison with the average intensity in the scene, and lightness computation. It was  
68 concluded that although each factor plays a role, none of these factors are sufficient to  
69 predict the luminosity thresholds. Bonato & Gilchrist (1994) reported quantitative  
70 observation that an achromatic surface appears luminous when it has roughly 1.7 times  
71 luminance of a surface that would be perceived as white. In later years they reported that  
72 a surface with a smaller area appears to emit a light at lower luminance level (Bonato &  
73 Gilchrist, 1999). For chromatic stimuli, it was repeatedly shown that luminosity thresholds  
74 were negatively correlated with stimulus purity in a series of studies (Evans, 1959; Evans  
75 & Swenholt, 1967; Evans & Swenholt, 1968; Evans & Swenholt, 1969). They further  
76 pointed out the loci of luminosity thresholds over chromaticities are related to the upper-  
77 limit luminance of surface colors, known as MacAdam limit (MacAdam 1935a; MacAdam

78 1935b). Spiegle & Brainard (1996) measured luminosity thresholds using colored real  
79 objects placed under illuminants of different color temperatures. They supported Evans'  
80 consistent observation about chromaticity-dependent nature of luminosity thresholds  
81 and showed that the color of the illuminant also affects luminosity thresholds. They  
82 further suggested that the locus of luminosity thresholds can be explained by the  
83 physically realizable luminance level with real pigments under an estimated illuminant by  
84 a participant. This is an interesting conceptualization linking the luminous percept to  
85 illuminant lighting a scene. More recently, Uchikawa et al. (2001) pointed out that the  
86 brightness of colored surfaces rather than a physical luminance is highly correlated with  
87 luminosity thresholds of colored surfaces. Some studies revealed relation between  
88 luminous percept and other perceptual dimensions. For instance, surround stimuli at the  
89 same depth as a test field primarily affects the luminosity thresholds (e.g. Yamauchi &  
90 Uchikawa, 2005).

91  
92 These studies well characterized the properties of a test stimulus and of surrounding  
93 contexts that have an impact on luminosity thresholds. One implicit assumption here is  
94 that visual system bases luminous judgement on external factors available in a scene.  
95 Such strategy is prevalent in many other visual judgements. For example, a famous  
96 anchoring theory determines a reference based on simple statistics in a given scene (e.g.  
97 highest luminance in a scene) which has been successful in explaining empirical results  
98 involving lightness judgement (Gilchrist & Bonato, 1995; Gilchrist et al. 1999).  
99 Alternatively, visual system might internally hold more absolute criterion for luminous  
100 judgement. For instance, it was shown that our visual system might use statistical  
101 regularities about possible range of surface color and illuminant color (Judd et al., 1964)

102 to solve an ill-posed problem such as color constancy (Maloney & Wandell, 1986). Also  
103 there are suggestions that color contrast and assimilation arise simply from learning of  
104 statistical regularities in external environments (Lotto & Purves, 2000; Long & Purves,  
105 2003). The success of these prior-based approaches implies a possibility that humans  
106 might take a similar strategy to make self-luminous judgement.

107

108 One primary focus in this study is to reveal whether determinants of luminosity thresholds  
109 are externally defined from one scene to another or internally held by visual system  
110 regardless of what are present in a scene. We specifically built a hypothesis based on  
111 the latter view: visual system internalizes the physical gamut of surface colors under  
112 various illuminants and refers to this knowledge when judging whether a given surface  
113 is self-luminous. This physical gamut can be visualized by hypothetical surface called  
114 optimal colors (MacAdam 1935a, MacAdam 1935b) which will be detailed in General  
115 Method section. This hypothesis was specifically led up based on the observation made  
116 in a series of color constancy experiments (Uchikawa et al, 2012; Fukuda & Uchikawa  
117 2014; Morimoto et al, 2016; Morimoto et al, 2021). In these studies, we developed a  
118 model for illuminant estimation that operated on the assumption that visual system  
119 internalizes the gamut of surface colors under various illuminants (i.e. distribution of  
120 optimal colors) and the model accounted for observers' estimation of illuminants  
121 reasonably well in a variety of conditions. One interpretation of luminosity thresholds is  
122 that we visualize the luminance level which visual system assumes as an upper-limit  
123 boundary of surface color. Thus, we speculated that loci of luminosity thresholds  
124 measured under different illuminants might resemble the locus of optimal colors.

125

126 We conducted three experiments to test our hypothesis. In each experiment, we  
127 presented a 2-degree circular colored test field surrounded by many overlapping colored  
128 circles. We measured luminosity thresholds as a function of test chromaticities.  
129 Experiment 1 was designed to test the degree to which luminosity thresholds were  
130 influenced by the color statistics of surrounding stimuli, in this case the geometry of color  
131 distribution. In Experiment 2, we tested the effect of illuminants as well as the shape of  
132 surrounding color distribution to reveal whether luminosity thresholds loci agree with  
133 optimal color locus under different illuminants (3000K, 6500K and 20000K). In  
134 Experiment 3, we measured the loci of luminosity thresholds under atypical illuminants  
135 (magenta and green) to investigate whether the loci of luminosity thresholds over  
136 chromaticities might differ between chromatically typical and atypical illuminants.

137

## 138 **2. General Method**

### 139 **2.1. Computation of physical upper-limit luminance at a given chromaticity**

140 We can compute the theoretical upper-limit luminance at each chromaticity by calculating  
141 the chromaticity and the luminance of optimal colors. Here we provide a basic idea of  
142 optimal color, but more detailed description is available elsewhere (Uchikawa et al., 2012,  
143 Morimoto, 2021). An optimal color is a hypothetical surface having a steep spectral  
144 reflectance function as shown in Figures 1 (a) and (b). There are two types (band-pass  
145 and band-stop types), and they can have only 0% or 100 % reflectances. Changing  $\lambda_1$   
146 and  $\lambda_2$  generate numerous optimal colors ( $\lambda_1 < \lambda_2$ ). To give concrete examples we  
147 generated three illuminants of black body radiation (Figure 1 (c)). Then, 102,721 optimal  
148 colors were rendered under these illuminants as shown by small dots in Figures 1 (d)  
149 and (e). Panel (d) shows  $L/(L+M)$  in MacLeod-Boynton (MB) chromaticity diagram

150 (MacLeod & Boynton, 1979) vs luminance distributions. Panel (e) shows  $\log_{10}S/(L+M)$   
151 vs. luminance distributions. To calculate cone excitations, we used the Stockman &  
152 Sharpe cone fundamentals (Stockman & Sharpe, 2000).

153

154 In the real-world surface reflectance must be less than 1.0 due to a physical constraint,  
155 and thus an optimal color has a higher luminance than any other surface that has the  
156 same chromaticity. Thus, no real surface can exceed this optimal-color distribution. To  
157 show this concretely, we show, in Figures 1(d) and (e), 49,667 objects in the standard  
158 object color spectra database for color reproduction evaluation (SOCS, ISO/TR  
159 16066:2003).

160

161 From optimal color distributions we see that the physical upper-limit luminance is  
162 dependent on the chromaticity. The peak of an optimal color distribution always  
163 corresponds to a full-white surface (1.0 reflectance across all wavelengths), which thus  
164 corresponds to the chromaticity and intensity of the illuminant itself (so-called white point  
165 of the illuminant). For this reason, when the color temperature of illuminant changes, the  
166 whole optimal color distribution shift towards the chromaticity of the illuminant without  
167 drastically changing the overall shape. Optimal colors with a higher purity have lower  
168 luminance, as they have a narrower-band reflectance and consequently the distribution  
169 spreads out as the purity increases. Importantly, once all optimal colors are calculated,  
170 we can look for the physical upper-limit luminance at any chromaticity by looking for the  
171 luminance of the optimal color at the chromaticity. Interestingly it is notable that the  
172 distribution of real objects (SOCS dataset) shows a somewhat similar shape to the  
173 optimal color distribution.

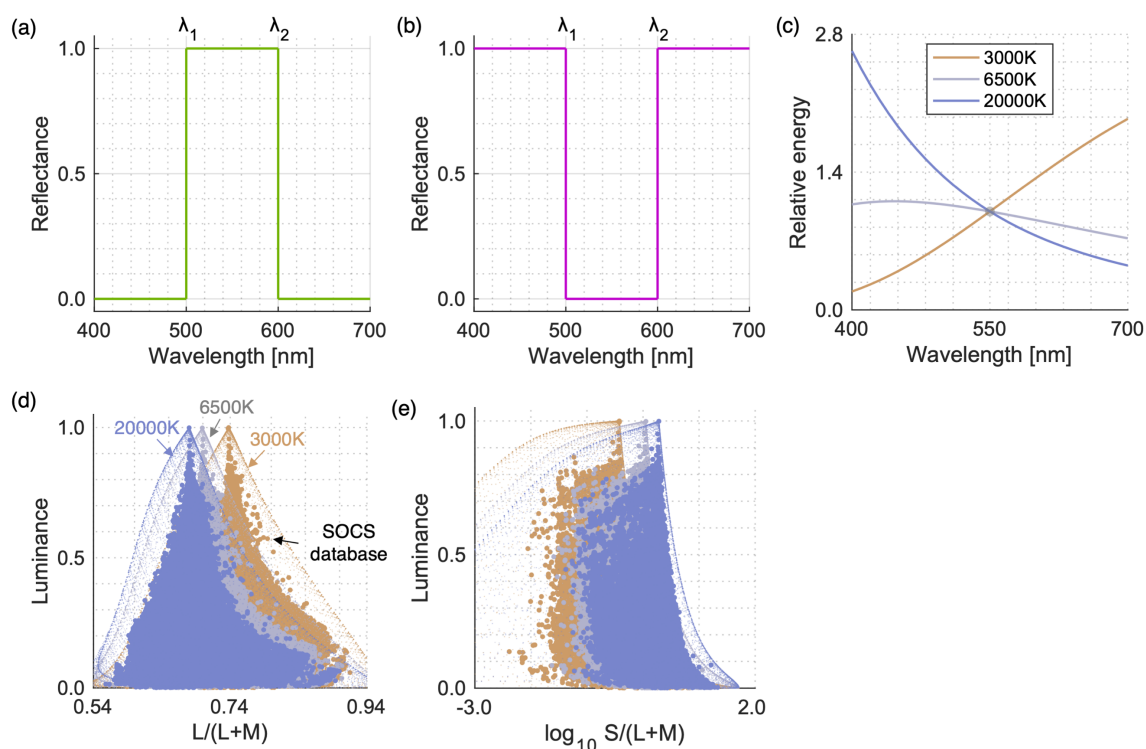

174

175 Figure 1: (a), (b) Example optimal colors of band-pass and band-stop types, respectively.

176 (c) Three illuminants defined based on Planck's radiation law. (d), (e)  $L/(L+M)$  vs.

177 luminance and  $\log_{10} S/(L+M)$  vs. luminance distributions, respectively, for optimal colors

178 and SOCS reflectance dataset rendered under 3000K, 6500K and 20000K.

179

180 **2.2. Estimation of the upper-limit luminance at a given chromaticity for real**

181 **surfaces**

182 Theoretical upper-limit luminance can be computed through the calculation of optimal

183 color, but the upper-limit luminance for real objects needs to be estimated. Thus, we

184 analyzed 49,672 surface reflectances from SOCS reflectance database (SOCS). This

185 dataset includes reflectances from a wide range of categories of natural and man-made

186 objects: photo (2304 samples), graphic (30,624), printer (7856); paints (229); flowers

187 (148); leaves (92); face (8049); Krinov datasets (370) including natural objects which



188 were measured in the separate study (Krinov, 1947). We then excluded reflectances that  
189 contained a value higher than 1.0 at any wavelength as they might include fluorescent  
190 substance. As a result, one reflectance from the printer category and 4 reflectances from  
191 the paints category were excluded.

192

193 Remaining 49,667 surfaces were then rendered under 6500K, and their chromaticity and  
194 luminance were calculated. The luminance value was normalized by that of the full-white  
195 surface (100% reflectance at any wavelength). As shown in Figure 2 (a), we plotted  
196 chromaticity of all surfaces on the MacLeod-Boynton chromaticity diagram, where  
197  $L/(L+M)$  is the horizontal axis and  $\log_{10} S/(L+M)$  is the vertical axis. We defined a grid of  
198  $25 \times 25$  bins and classified 49,667 colors into corresponding bins. Then, for each bin, the  
199 maximum luminance across all colors that belong to the bin was defined as the upper-  
200 limit luminance of real objects. This procedure was repeated for all 625 bins. The left and  
201 center subpanels in panel (b) show the upper-limit luminance for optimal color (for  
202 comparison purpose) and real objects. As seen here the locus of the upper-limit  
203 luminance for real objects were not smooth. We assumed that this is an artifact due to a  
204 limited availability of reflectance samples in the database rather than a nature of  
205 reflectances of real objects. Thus, we smoothed the upper-limit luminances based on  
206 spatial filtering by  $3 \times 3$  convolutional filters (each pixel has the value of  $1/9$ ). The right  
207 subpanel indicates the smoothed data. Note that this upper-limit luminance heatmap is  
208 dependent on the color of illuminant. Thus we repeated the same procedure for other  
209 black-body illuminants with color temperatures from 3000K to 20000K with 500 K steps.  
210 Both optimal color locus and real objects locus unsurprisingly peak at the chromaticity of  
211 illuminant shown by the red cross symbol. The upper-limit luminance of real objects

212 decrease as the stimulus purity increases more sharply than that of optimal colors. We  
 213 can refer to these look-up-table to find the upper-limit luminance of real objects for an  
 214 arbitrary chromaticity under illuminant with a range of color temperatures.

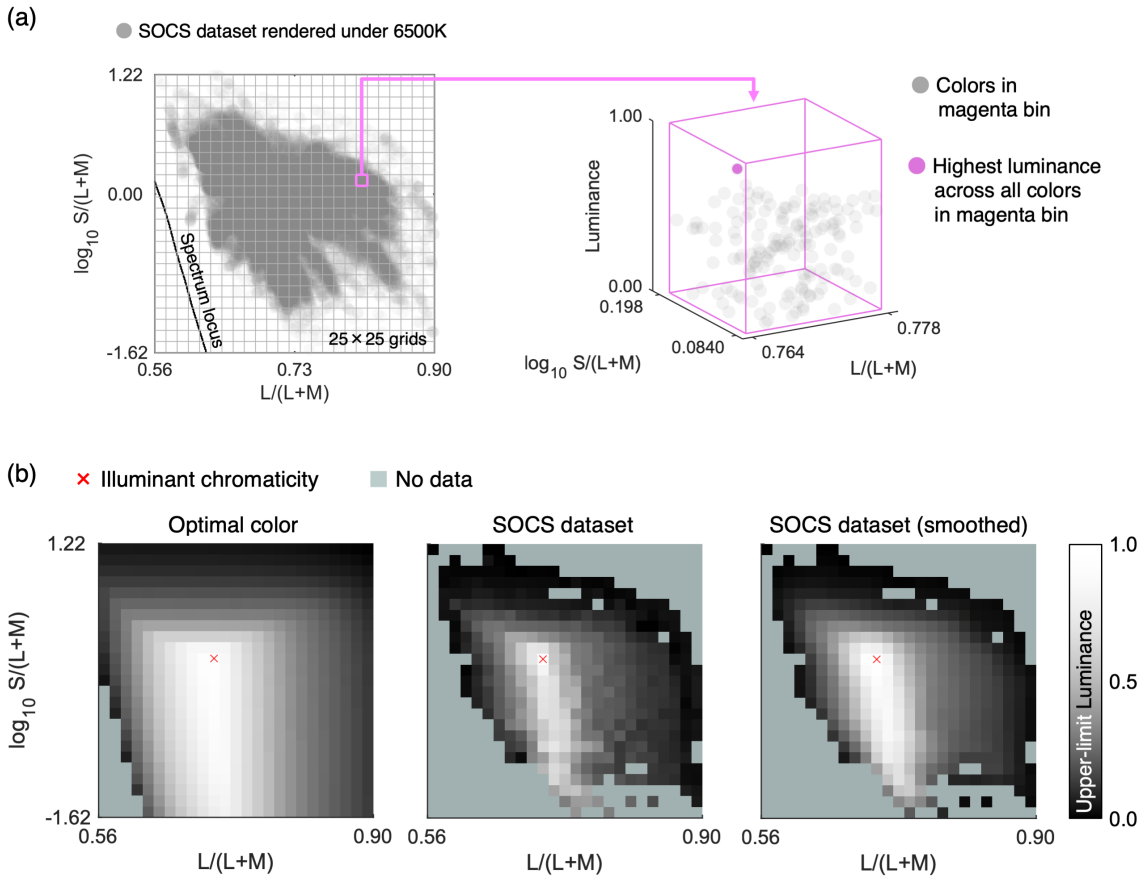

215  
 216 Figure 2: How to estimate the upper-limit luminance for real objects using the SOCS  
 217 spectral reflectance dataset.  $25 \times 25$  grid was first drawn on MacLeod-Boynton  
 218 chromaticity diagram. For each grid bin, we searched the surface that has the highest  
 219 luminance as shown at the right part of panel (a), which was defined as the upper-limit  
 220 luminance for the chromaticity bin. (b) From left to right, the locus of upper-limit  
 221 luminance for optimal color, real objects (raw), and real objects (smoothed). The  
 222 lightness indicates the upper-limit luminance for chromaticity bins. The pale green color  
 223 indicates there is no data in that bin.

224 **2.3. Observers**

225 Four observers (KK, MI, TM and YK) participated in Experiment 1. KK and YK were also  
226 recruited to Experiment 2 as well as two new observers (KS and NT). KK, KS and YK  
227 participated in Experiment 3. Observers ages ranged between 22 and 57 (*mean* 31.4,  
228 *s.d.* 13.2). Observers were all Japanese. All observers had corrected visual acuity and  
229 normal color vision as assessed by Ishihara pseudo-isochromatic plates.

230

231 **2.4. Stimulus Configuration**

232 The stimulus configuration is shown in Figure 3. The color distribution for surrounding  
233 stimuli and chromaticities used for test field are detailed in each experimental section.  
234 The spatial pattern was shuffled for each trial.

235

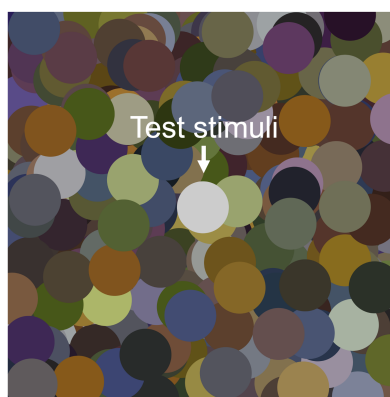

236

237 Figure 3: Example of stimulus configuration. The center circle is a test stimulus, and its  
238 luminance was adjusted by observers. Each circle had a diameter of 2 degrees in visual  
239 angle, and the whole image subtended  $15 \times 15$  degrees. The surrounding color  
240 distribution is detailed in each experimental section.

241

242

## 243 **2.5. Apparatus**

244 Data collection was computer-controlled and all experiments were conducted in a dark  
245 room. Stimuli were presented on a cathode ray tube (CRT) monitor (BARCO, Reference  
246 Calibrator V, 21 inches, 1844 × 1300 pixels, frame rate 95Hz) controlled with ViSaGe  
247 (Cambridge Research Systems), which allows 14-bit intensity resolution for each of RGB  
248 phosphors. We conducted gamma correction using a ColorCAL (Cambridge Research  
249 Systems) and spectral calibration was performed with a PR650 SpectraScan Colorimeter  
250 (Photo Research inc.). Observers were positioned 114 cm from the CRT monitor and the  
251 viewing distance was maintained with a chin rest. Observers were asked to view the  
252 stimuli binocularly.

253

## 254 **2.6. General procedure**

255 Observers first dark-adapted for 2 mins and then adapted to an adaptation field for 30  
256 seconds. The adaptation field was the full uniform screen that had either the chromaticity  
257 of 6500K (Experiments 1 and 3) or the chromaticity of test illuminant (Experiment 2), and  
258 in either case the luminance was equal to mean luminance value across surrounding  
259 stimuli. Then, the first trial began. We drew surrounding stimulus circles so that they had  
260 a specific color distribution as detailed in each experimental section. The 2-degree  
261 circular test field was presented at the center of the screen. The test field was never  
262 occluded by surrounding stimuli. Observer's task was to adjust the luminance of the test  
263 field to the level at which the surface-color mode changed to the aperture-color mode.  
264 The ambiguity regarding the criterion to judge the transition between surface-color mode  
265 and aperture-color mode was reported in a past study (Speigle & Brainard, 1978,  
266 Uchikawa et al., 2001). This is mainly because the transition is not sharp, and there is a

267 range that a surface can appear the mixture of surface-color mode and aperture color  
268 mode. We took care this issue and instructed observers to set the luminance value to  
269 the halfway between the upper-limit of the surface color mode and the lower-limit of the  
270 aperture color mode. During the experiments, observers were instructed to view whole  
271 stimuli rather than fixating at a specific point to avoid local retinal adaptation. The initial  
272 luminance value for the test field was randomly chosen from 2.0, 5.0, 8.0, 11.0, 14.0,  
273 17.0, 20.0, 23.0, 26.0 and 29.0  $\text{cd/m}^2$ . Specific experimental conditions are detailed in  
274 each experimental section.

275

### 276 **3. Experiment 1**

#### 277 **3.1 Surrounding color distribution, test illuminant and test chromaticity**

278 In a natural scene, the colors of objects tend to cluster around the white point of illuminant  
279 and the density of colors decreases as purity increases. Consequently, the color  
280 distribution tends to form a mountain-like shape as shown in Figure 1 (d). The aim of  
281 Experiment 1 was to investigate how loci of luminosity thresholds change when  
282 thresholds are measured in a scene that has an atypical shape of color distribution. In  
283 an extreme case, where observers purely rely on internal criteria to judge self-luminous  
284 surface, the luminosity thresholds should not change at all regardless of surrounding  
285 color distribution. However, in contrast if observers make a self-luminous judgement  
286 using surrounding colors, for example by estimating the upper luminance boundary from  
287 surrounding distribution, luminosity thresholds should largely change depending on the  
288 shape of surrounding color distribution.

289

290 Figure 4 (a) shows the five surrounding color distributions used in Experiment 1. The

291 6500K illuminant on the black-body locus was chosen as a test illuminant in this  
292 experiment. We first defined *natural* color distribution at upper-left subpanel and then  
293 transformed the distribution to generate 4 atypical color distributions (*reverse*, *flat*, *slope+*  
294 and *slope-*) in following ways. First, to construct the *natural* color distribution, we used  
295 dataset of 574 spectral reflectances of natural objects (Brown, 2003). Out of 574  
296 reflectances, 516 reflectances were inside the chromaticity gamut of the experimental  
297 CRT monitor when rendered under the 6500K test illuminant. All stimuli were presented  
298 via a ViSaGe, which had the technical constraint that only 253 colors can be  
299 simultaneously presented. Thus, we selected 253 reflectances samples out of 516  
300 reflectances so that when rendered under 6500K, 253 colors approximately spatially  
301 uniformly distribute in a three-dimensional color space ( $L/(L+M)$ ,  $S/(L+M)$  and  $L+M$ ).

302

303 To generate the other color distributions (*reverse*, *flat*, *slope+* and *slope-*), we  
304 independently scaled each of 253 reflectances by a scalar value to manipulate the  
305 luminance while keeping the chromaticity constant. The inserted image in each subpanel  
306 shows an example of surrounding stimuli that has a corresponding color distribution.  
307 Note that the spatial layout of surrounding stimuli was shuffled for each trial. For all  
308 distributions, the intensity of test illuminant was determined so that a full-white surface  
309 (i.e. 100% reflectance across all visible wavelengths) had the luminance of 35.0 cd/m<sup>2</sup>  
310 under the test illuminant.

311

312 For the center test field, we chose 9 reflectances from the 253 reflectances so that they  
313 fall closely on the black-body locus when placed under 6500K illuminant. The panel (b)  
314 in Figure 4 shows these 9 test chromaticities at which luminosity thresholds were

315 measured.

316

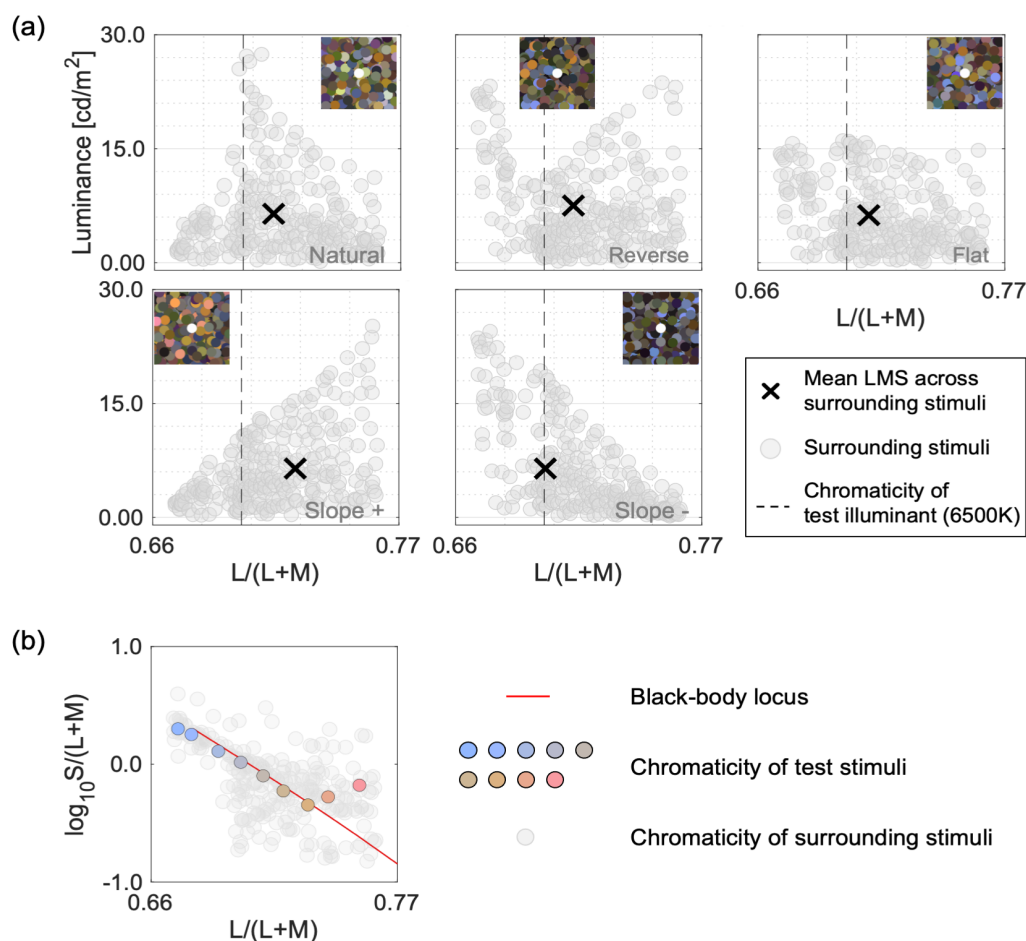

317

318 Figure 4: (a) 5 color distribution sets for surrounding stimuli. An inserted image at top

319 part shows an example stimulus configuration for each color distribution. The vertical

320 dashed black line indicates L/(L+M) value of 6500K test illuminant. Black cross symbols

321 indicate mean cone response across all 253 surrounding stimuli. (b) 9 test chromaticities

322 at which the luminosity thresholds were measured.

323

### 324 3.3 Procedure

325 One block consisted of 9 settings to measure thresholds at all 9 test chromaticities in a

326 random order. There were 5 blocks in each session to test all 5 distribution shapes. The

327 order of distribution condition was randomized. All observers completed 20 sessions in  
328 total (i.e. 20 repetitions for each data point). They completed 10 sessions per day and  
329 thus experiments were conducted in two days.

330

### 331 **3.3 Results**

332 Figure 5 shows results in Experiment 1. Colored symbols with error bars indicate each  
333 observer's setting. Each data point is the average across 20 repetitions. The average  
334 across 4 observers is shown by black circles. There were some variations across  
335 individuals. Furthermore, the experimental design was to try to collect reliable data from  
336 a small number of participants. Thus, we argue results individually. The magenta circles  
337 show luminances of optimal colors at test chromaticities when rendered under the test  
338 6500K illuminant (the optimal color locus). In other words, if the visual system uses the  
339 optimal color to judge whether a surface emits a light, the observers setting should match  
340 the magenta line. The blue line shows a smoothed upper-limit luminance locus of real  
341 objects, estimated from SOCS reflectance dataset as shown in Figure 2, which more  
342 rapidly decreases as it gets away from the white point than the optimal color locus does.  
343 For simplicity, we hereafter refer to the magenta and blue lines as predictions of the  
344 optimal color model and the real object model, respectively.

345

346 First, all observers showed that loci of luminosity thresholds show the mountain-like  
347 shape regardless of surrounding color distribution. The loci generally peaked around the  
348 chromaticity of a test illuminant (the vertical black dashed line) and the luminosity  
349 threshold decreases as the test chromaticity gets away from the white point. Although  
350 there are some individual differences, especially in the overall setting level (e.g. KK



351 generally has higher thresholds than others) and in the peak chromaticity, the luminosity  
 352 thresholds generally seem to be more resemble the prediction of the optimal color model  
 353 than that of the real object model in this experiment. This is consistent with the  
 354 hypothesis that the visual system knows the upper boundary of the optimal color  
 355 distribution and judges that a given surface is self-luminous when its luminance exceeds  
 356 the luminance of optimal colors.

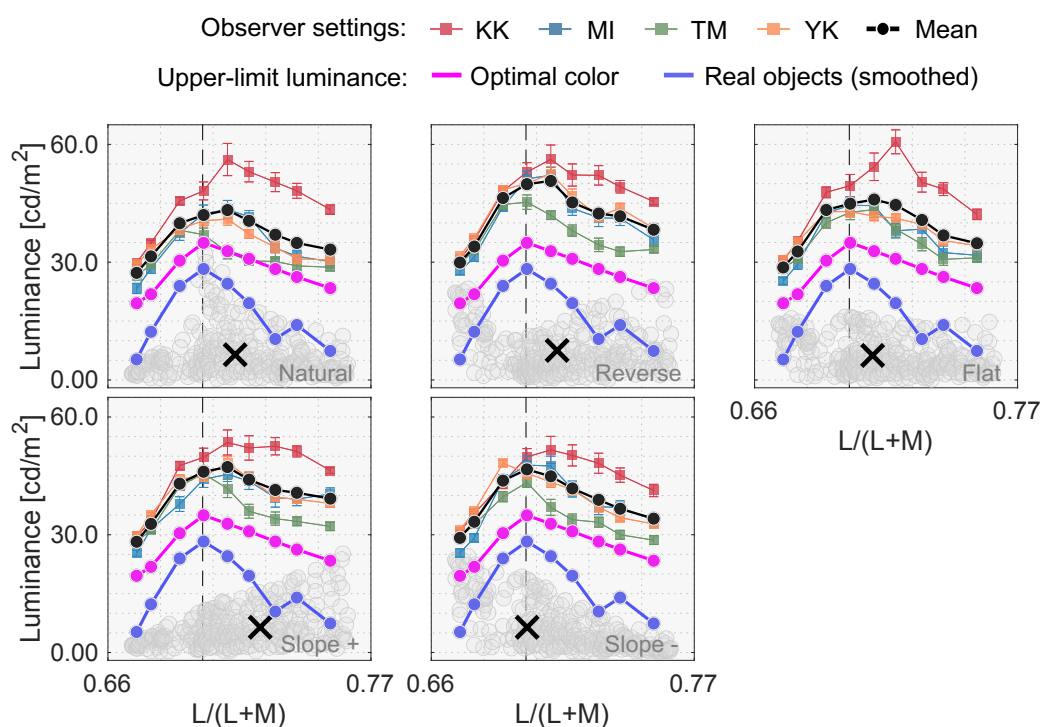

357  
 358 Figure 5: Colored square symbols indicate averaged settings across 20 repetitions for  
 359 each observer. The error bar indicates  $\pm$  S.E across 20 repetitions. The black circle  
 360 symbols indicate average observer settings ( $n = 4$ ). The magenta circle symbols  
 361 denote the luminance of the optimal color at test chromaticities and thus indicate the  
 362 physical upper-limit luminance. The blue line shows the upper-limit luminance of real  
 363 objects estimated from the SOCS reflectance dataset. The vertical dashed line shows  
 364 the chromaticity of the test illuminant (6500K). The black cross symbol indicates mean  
 365 LMS value across surrounding stimuli.

366

367 To quantify the similarity between observers and models, we calculated Pearson's  
368 correlation coefficient between observer settings and model predictions over 9 test  
369 chromaticities. The Figure 6 shows summary matrices of correlation coefficient. We  
370 calculated correlation coefficients for each observer and discuss them on an individual  
371 basis.

372

373 The magenta and blue symbols indicate the optimal color model and the real object  
374 model, respectively. In addition, we evaluated a model to judge the self-luminous  
375 surface when its luminance exceeds the surrounding color distribution. The luminosity  
376 thresholds estimated from such model should show the similarity to the shape of  
377 surrounding color distribution. For example, in the reverse condition, the luminosity  
378 threshold should be lowest at white point and increase as the saturation of the test  
379 stimulus increases. This model is labelled as "surrounding color" in the Figure 6. Note  
380 that this is a simplified model, and it is unlikely that visual system takes such strategy.  
381 Instead, our goal here was to build a framework in which we quantitatively predict an  
382 observer's behaviour if she/he judges the luminosity thresholds solely based on what's  
383 externally presented in each trial without using any prior about statistics in the real  
384 world.

385

386 The cyan star symbols in some cells indicate the highest correlation-coefficient value  
387 across 3 tested models. The cyan arrows below each subpanel indicates the model  
388 that received the highest number of cyan stars across 4 observers.

389

390 Overall, since the observer settings are stable across all distribution conditions, the  
391 correlation coefficient patterns are also similar between the optimal color and the real  
392 object models whose prediction are both not affected by surrounding colors. However,  
393 the correlation coefficients for the surrounding color model strongly depend on  
394 distribution condition as predicted. Specific trends are as follows. For observers KK  
395 and MI, the loci of luminosity thresholds showed highest correlation with the optimal  
396 color model for all distributions. For TM, the real object model was the best predictor in  
397 all distributions except for the Flat condition. For YK, the optimal color model showed  
398 the highest correlation for *reverse*, *flat* and *slope+* conditions while the real object  
399 model showed the highest correlation for *natural* and *slope-* conditions. If we  
400 summaries these trends based on the number of cyan arrows each model received,  
401 the optimal color model is the best predictor in Experiment 1.

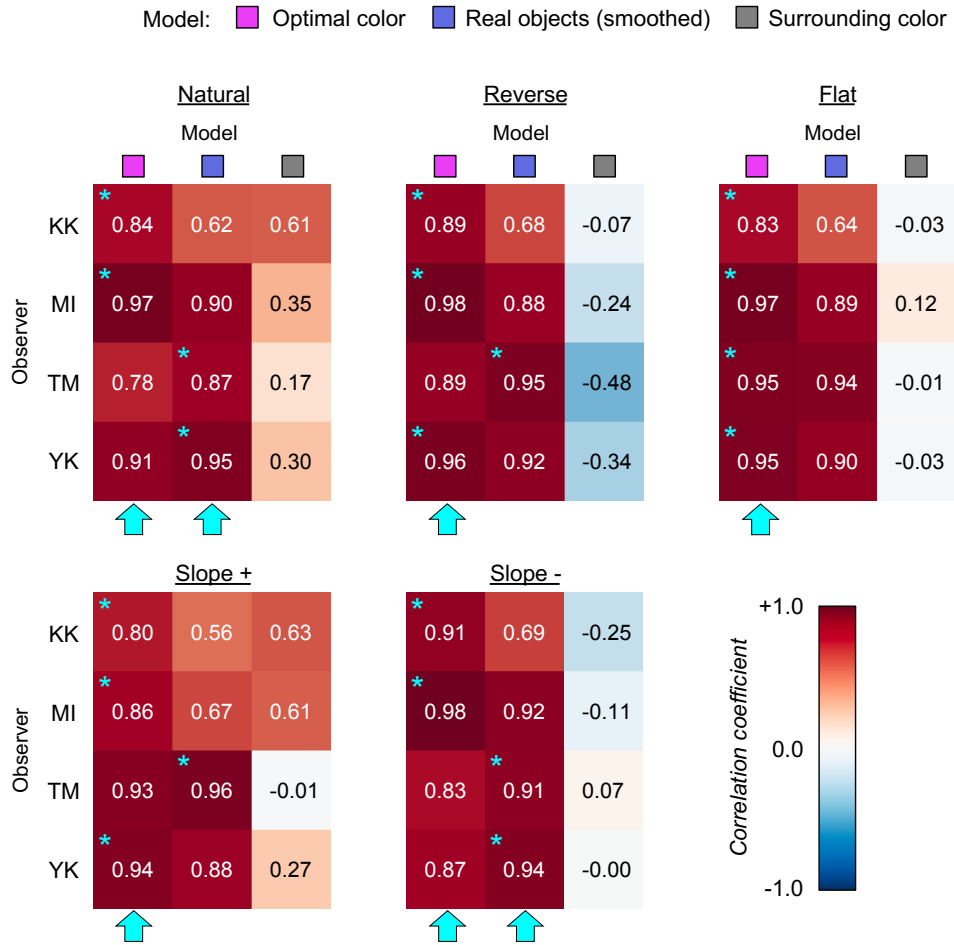

402

403 Figure 6: The matrices of Pearson's correlation coefficient calculated between observer  
 404 settings and model predictions over 9 test chromaticities. Each subpanel indicates  
 405 each distribution condition (*natural*, *reverse*, *flat*, *slope+* and *slope-*). The color of  
 406 individual cell indicates the correlation coefficient as denoted by the color bar. The cyan  
 407 star symbol indicates the highest correlation coefficient across 3 models. The cyan  
 408 arrows at the bottom of each subpanel show the model that received the highest  
 409 number of cyan star marks, indicating a good candidate model of human observers'  
 410 strategy to judge the self-luminous surface.

411

412 The major finding in this experiment is that the loci of luminosity thresholds are nearly

413 invariant regardless of the shape of surrounding color distribution. This result supports  
414 the idea that observers use an optimal color distribution as an internal reference to  
415 determine the luminosity thresholds rather than what is presented in a scene. In  
416 Experiment 2, we tested whether this observation holds under different illuminants which  
417 changes the shape of optimal color distribution as shown in Figure 1. If the visual system  
418 indeed uses the optimal color, the luminosity thresholds should also follow the change in  
419 a consistent way that optimal color distribution changes.

420

## 421 **4. Experiment 2**

### 422 **4.1 Surrounding color distribution, test illuminant and test chromaticity**

423 We employed *natural*, *reverse* and *flat* distributions of surrounding colors. For test  
424 illuminants, we used 3000K, 6500K and 20000K on the black-body locus whose spectral  
425 distributions are shown in panel (c) of Figure 1. For surrounding stimuli, we sampled 180  
426 out of 253 reflectances used in Experiment 1 that were inside the chromaticity gamut of  
427 the experimental CRT monitor under all test illuminants. The panel (a) in Figure 7 shows  
428 all 9 test surrounding conditions (3 distributions  $\times$  3 test illuminants).

429

430 We then selected 15 surface reflectances from the 180 reflectances. The panel (b) shows  
431 the 15 test chromaticities when rendered under each test illuminant at which the  
432 luminosity threshold was measured.

433

434

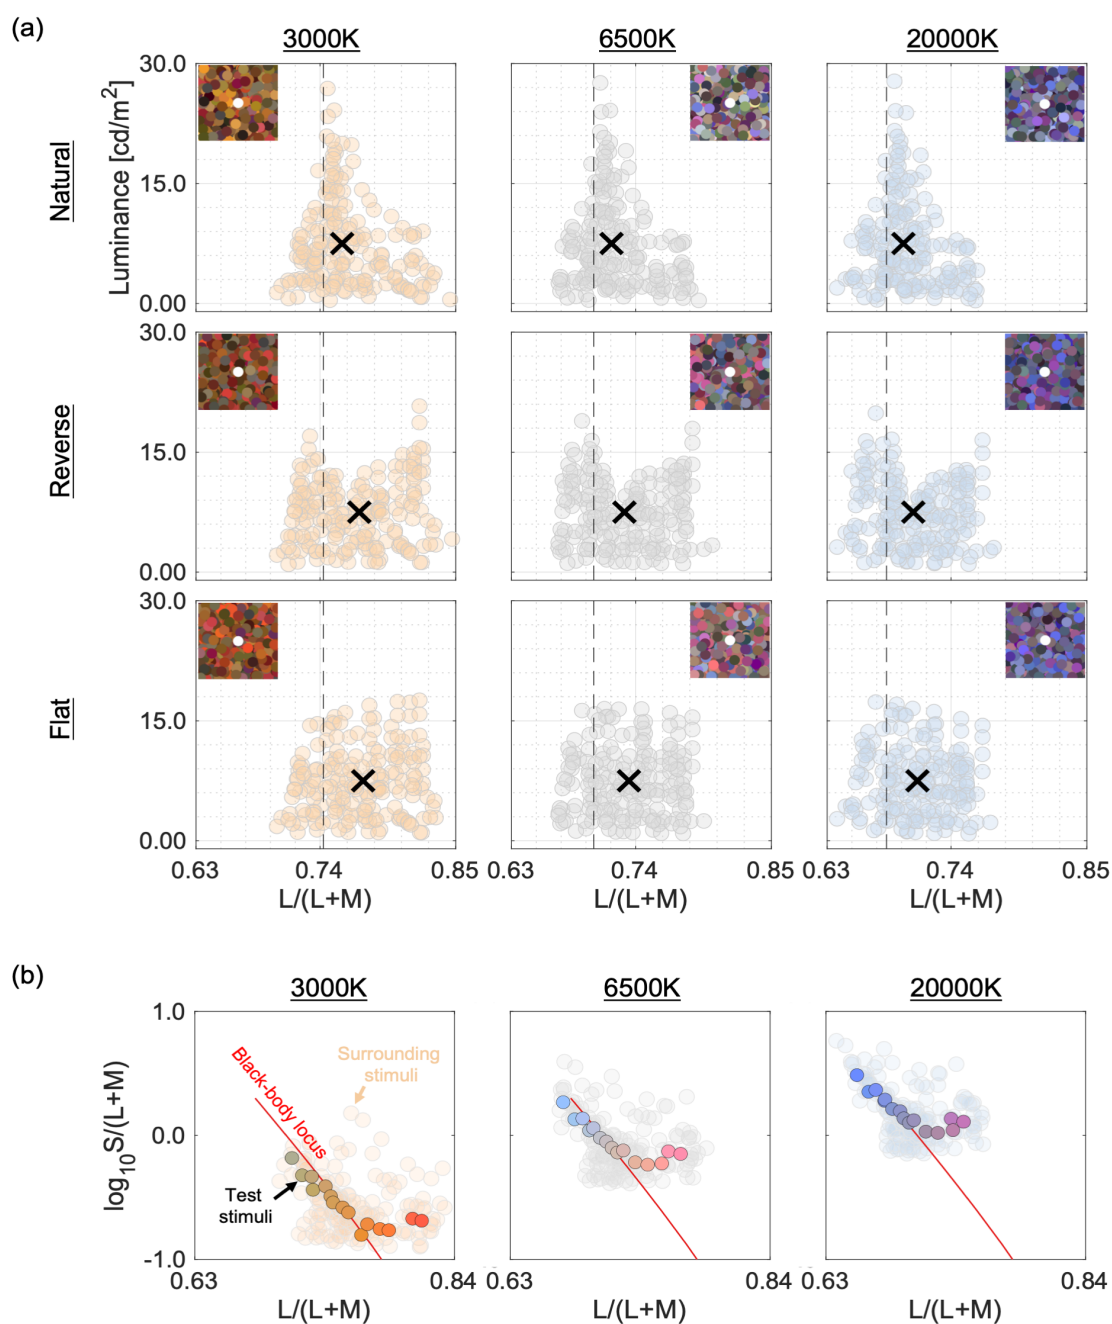

435

436 Figure 7: (a) 9 color distributions for surrounding stimuli (3 test illuminants × 3

437 distributions). Inserted image shows an example stimulus configuration. The vertical

438 dashed black line indicates the L/(L+M) value of each test illuminant. Black cross

439 symbols indicate mean cone response values across 180 surrounding stimuli. (b) 15

440 test chromaticities at which the luminosity threshold was measured.

441 **4.2 Procedure**

442 One block consisted of 15 consecutive settings to measure thresholds for all test  
443 chromaticities presented in a random order. There were 9 blocks in one session to test  
444 all conditions (3 illuminants  $\times$  3 distributions). The order of condition was randomized. All  
445 observers completed 10 sessions in total. The experiment was conducted in three days.

446

447 **4.3 Results**

448 The black line in Figure 8 shows the mean setting across 4 observers. The rest of the  
449 data presentation follows the result in Experiment 1. For the clarity, only the averaged  
450 setting is shown here, but the individual observers' data is presented in Figure S1 in  
451 Supplementary material.

452

453 First, the mean settings showed that the locus of luminosity thresholds were again  
454 mountain-like shape, and the influence of the shape of surrounding color distribution was  
455 almost absent, supporting the finding in Experiment 1. It is also noticeable that the peak  
456 chromaticity of the mean setting in each panel shifted towards the illuminant chromaticity  
457 shown by vertical dashed lines.

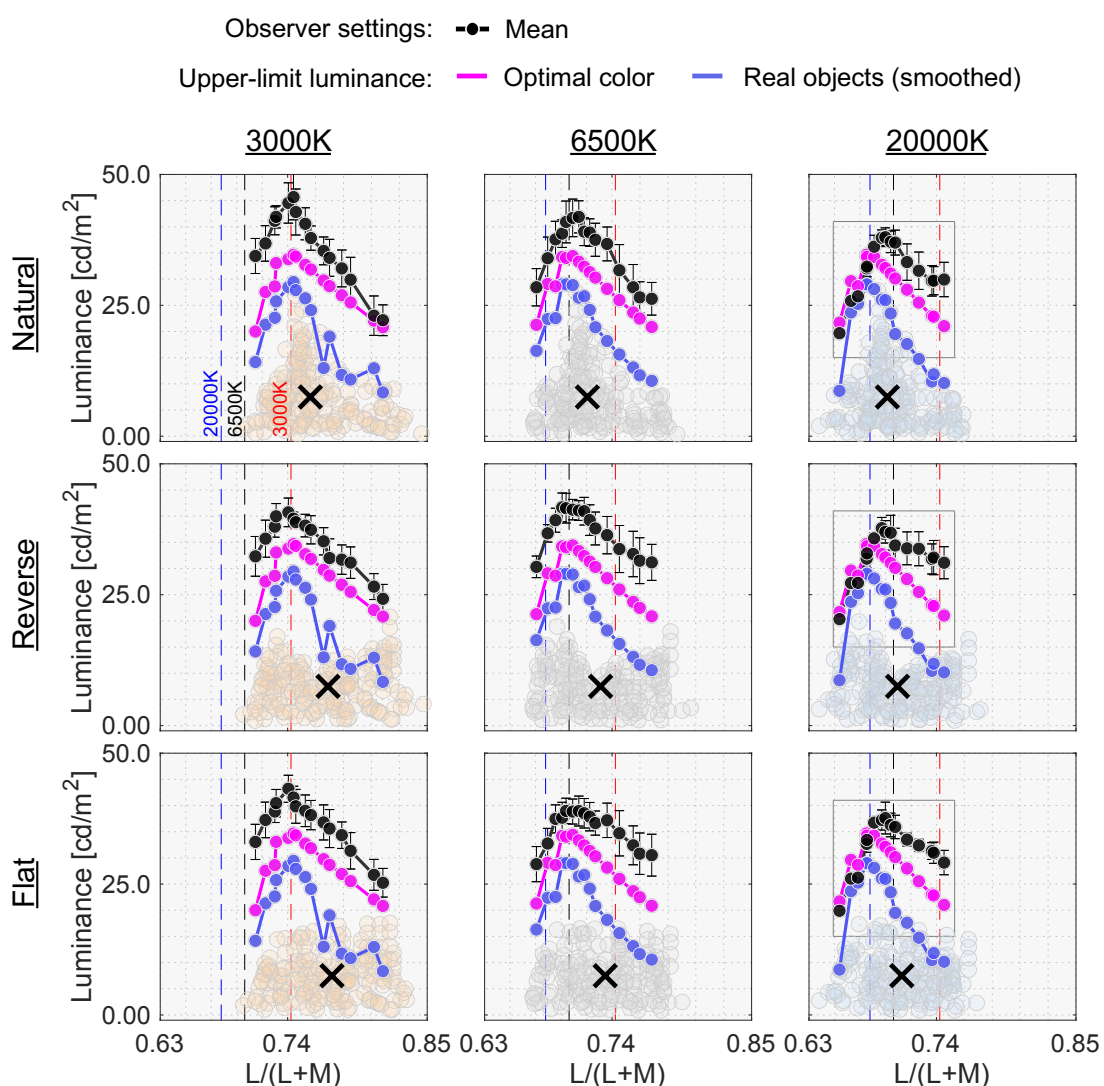

458

459 Figure 8: The black circle symbols indicate average observer settings ( $n = 4$ ). The error  
 460 bar indicates  $\pm$  S.E across 4 observers. The magenta circle symbols denote the optimal  
 461 color locus. The blue line shows the upper-limit luminance of real objects. The red,  
 462 black and blue vertical dashed lines show the chromaticities of test illuminants of  
 463 3000K, 6500K and 20000K, respectively. The black cross symbol indicates mean LMS  
 464 value across surrounding stimuli. The individual observer data is shown in  
 465 supplementary material. A region surround by a rectangle in 20000K condition are  
 466 further discussed in Figure 9.

467



468 It should be noted that the peak chromaticity of luminosity threshold loci for 20000K was  
469 slightly shifted to higher L/(L+M) direction from the chromaticity of the test illuminant.  
470 This trend was generally consistent across observers as shown in Figure S1. One  
471 potential reason would be that observers misestimated the illuminant color from the  
472 surrounding colors. Human color constancy is often imperfect, and thus we speculated  
473 that observers' luminance settings might better agree with the optimal color or real  
474 objects rendered under an illuminant estimated by each observer instead of a ground-  
475 truth illuminant (20000K). In fact allowing misestimate of illuminant color was also  
476 reported be an important factor in predicting luminosity thresholds by Spiegle and  
477 Brainard (1990). The estimated illuminant is normally measured using a technique such  
478 as achromatic setting (Brainard, 1998), but these data were not collected in this study.  
479 Thus, we assumed the peak chromaticity of observer settings as the observer's  
480 estimated illuminant.

481

482 We first calculated the chromaticities of illuminants from 3000K to 20000K in 500K steps.  
483 Then, for each observer and for each condition independently, we searched the color  
484 temperature that has the closest chromaticity to the peak chromaticity of the luminosity  
485 thresholds. Table 1 summarizes color temperatures of the estimated illuminants in each  
486 condition. In 3000K condition, estimated illuminants matched ground-truth color  
487 temperature for most observers. For 6500K, there was a slight variation across  
488 observers. It is notable that in 20000K condition that observers estimated color  
489 temperatures substantially lower than those of the ground-truth.

490

491

492 Table1: Estimated illuminant by each observer judged from the chromaticity at which  
 493 luminosity thresholds peaked. The top row shows the color temperatures of ground-  
 494 truth illuminants and the numbers in other cells indicate the color temperature of  
 495 estimated illuminants.

|         |    | 3000K | 6500K | 20000K |
|---------|----|-------|-------|--------|
| Natural | KK | 3000  | 5500  | 10500  |
|         | KS | 3000  | 7000  | 8500   |
|         | NT | 3000  | 5000  | 10500  |
|         | YK | 3000  | 5500  | 12000  |
| Reverse | KK | 3000  | 6500  | 7500   |
|         | KS | 4000  | 7000  | 7500   |
|         | NT | 3000  | 5500  | 12000  |
|         | YK | 3500  | 5000  | 10500  |
| Flat    | KK | 3000  | 7000  | 8500   |
|         | KS | 3000  | 5000  | 8500   |
|         | NT | 3000  | 5500  | 12000  |
|         | YK | 3000  | 6500  | 12000  |

496

497 Then, we drew optimal color loci under these estimated color temperatures. This concept  
 498 is depicted in Figure 9. Intuitively speaking this procedure allows us to equate the peak  
 499 between the optimal color locus and the measured luminosity thresholds locus. The pale  
 500 magenta curve shows the optimal colors under the estimated illuminant and seems to  
 501 predict mean observer settings better than the optimal color locus under the ground-truth  
 502 illuminant (20000K).

503

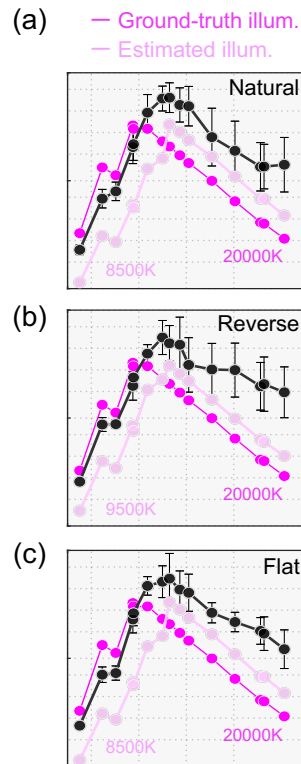

504

505 Figure 9: Optimal color models based on ground-truth illuminant (magenta) and based  
506 on estimated illuminants for averaged observer setting (pale magenta). It is shown that  
507 observers' settings are better explained by the optimal color model that allows  
508 misestimation of illuminants by observers.

509

510 Figure 10 indicates correlation coefficient matrices for all conditions. We compare  
511 correlations from 5 models: (i) optimal color model and (ii) real object model under  
512 ground-truth illuminant, (iii) optimal color model and (iv) real object model under  
513 estimated illuminant, and (v) surrounding color model. Again, the cyan star symbol in  
514 cells indicates the highest correlation across 5 models for that participant. The cyan  
515 arrows below each subpanel indicates the model that has the highest number of cyan  
516 stars indicating the overall best model for that condition.

517

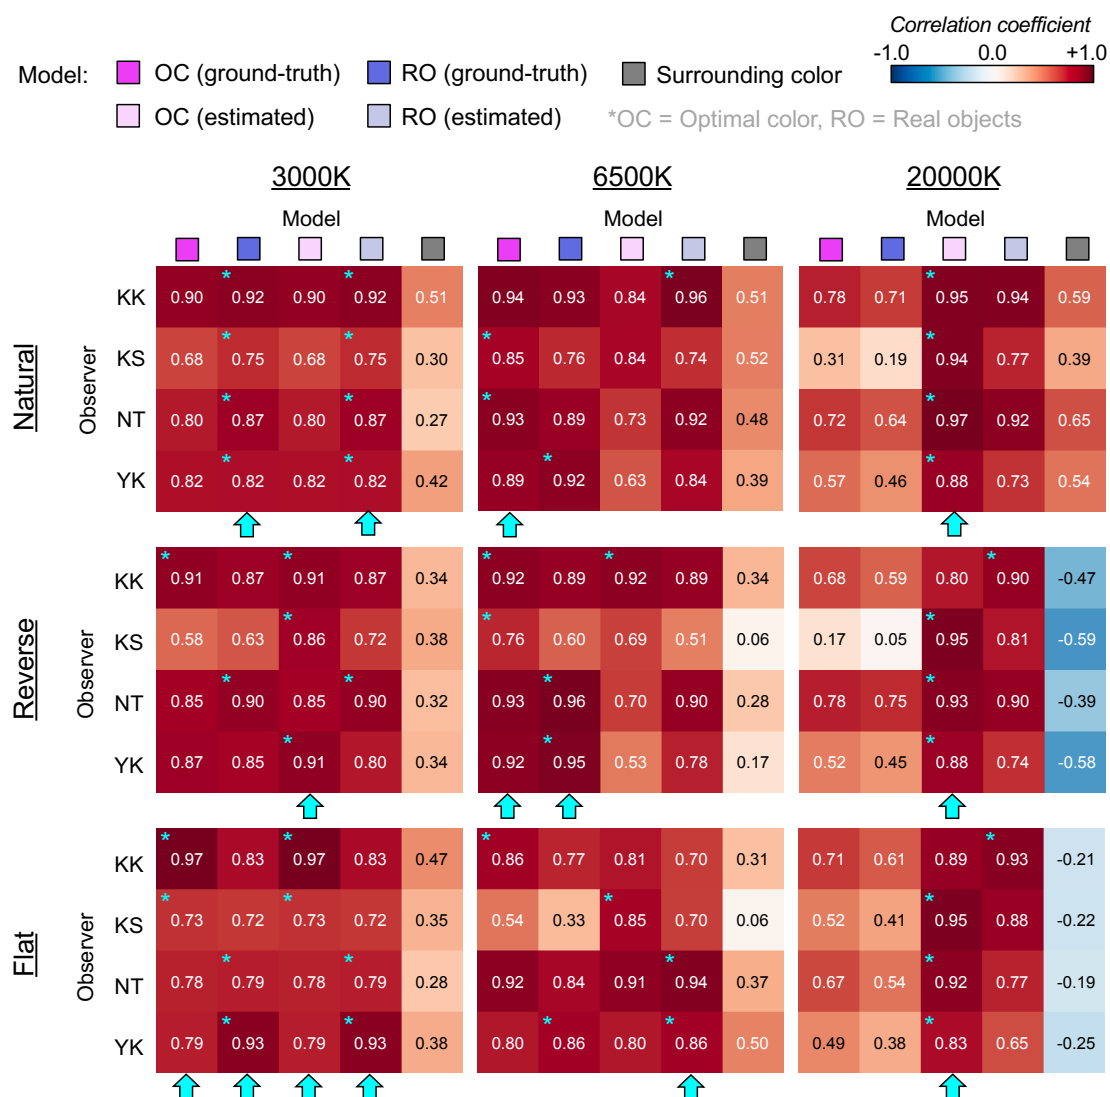

518

519 Figure 10: The matrices of Pearson's correlation coefficient calculated between  
 520 observer settings and model prediction over 15 test chromaticities. The cyan star  
 521 symbol indicates the highest correlation coefficient across 5 models. The cyan arrows  
 522 at the bottom of each subpanel show the model that received the highest number of  
 523 cyan star mark.

524

525 Overall, the surrounding color model does not show high correlation with observer  
 526 settings in any condition, agreeing with the trends in Experiment 1. The optimal color

527 model and the real object model seem to show high correlation, and it depends on the  
528 condition whether which model shows a higher correlation. For 3000K, *natural*  
529 condition shows highest correlation was found for the real object model, consistently  
530 across all observers. For *reverse* condition, all observers except NT showed highest  
531 correlations with the optimal color model under estimated illuminant while for *flat*  
532 condition the votes were split between optimal color and real object models. For  
533 *natural*-6500K, KS and NT were well predicted by the optimal color model under  
534 ground-truth illuminant, but other two observers were better correlated with the real  
535 objects model. For *reverse* condition, the optimal color and the real object model both  
536 show high correlation. The real object model under estimated illuminant predicted best  
537 in *flat* distribution condition. It is notable that for 20000K condition, the optimal color  
538 model under the estimated illuminant was consistently the best predictor. It is also  
539 shown that the optimal color model under the ground-truth illuminant shows much  
540 lower correlations, suggesting that considering observers' misestimate of illuminants  
541 plays a role in predicting luminosity thresholds. In summary both the optimal color  
542 model and the real object model both showed a fairly good agreement with human  
543 observers' settings.

544

545 Experiments 1 and 2 collectively suggested that both optimal color locus and real  
546 object locus seemed to be a good candidate determinant of luminosity thresholds. One  
547 noteworthy feature in Experiments 1 and 2 is that we used illuminants on blue-yellow  
548 axis that are typically found in natural environments. We also used chromaticities on  
549 black-body locus for the test field. If we assume that visual system learns the locus of  
550 optimal color distribution or real objects distribution through observing colors in natural

551 environments, luminosity thresholds under atypical illuminants may not well agree with  
552 prediction of the optimal color model or the real object model. We directly tested this  
553 hypothesis in Experiment 3.

554

## 555 **5. Experiment 3**

556 Experiment 3 tested whether luminosity thresholds resembled optimal color locus  
557 under atypical illuminants. We also chose a wider range of test chromaticities from the  
558 black-body locus and a locus that is orthogonal to the black-body locus.

559

### 560 **5.1 Surrounding color distribution, test illuminant and test chromaticity**

561 We employed *natural*, *reverse* and *flat* for surrounding distributions. For test illuminants,  
562 we used magenta and green illuminants. We chose two color filters (Rosco, R44 “Middle  
563 Rose” and R4460 “Calcolor 60 Green”) and 6500K illuminant was passed through these  
564 filters to obtain the spectra shown Figure 11 (a). The chromaticities of these illuminants  
565 largely deviate from black-body locus as shown in panel (b). Out of the 574 spectral  
566 reflectances of natural objects collected by Brown, 251 reflectance were inside the  
567 chromaticity gamut of the CRT monitor under both illuminants. For surrounding stimuli,  
568 we sampled 180 reflectances out of the 251 reflectances and created each distribution  
569 following the manipulation used in Experiments 1 and 2.

570

571 Panel (a) in Figure 12 shows surrounding distributions for all 6 test conditions (3  
572 distributions  $\times$  2 test illuminants). The intensities of test illuminants were determined so  
573 that average luminance across 180 colors matches  $2.5 \text{ cd/m}^2$ .

574

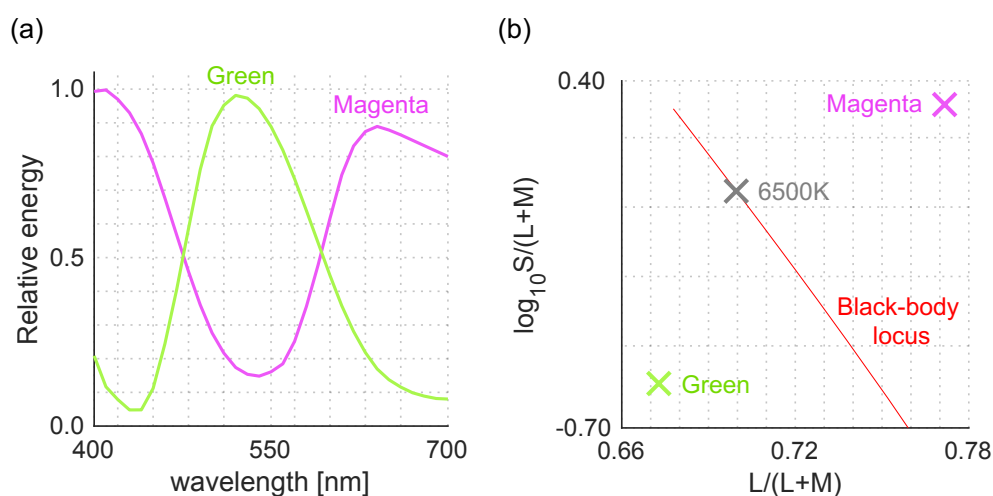

575

576 Figure 11: (a) Spectra for magenta and green illuminants used in Experiment 3. (b)

577 Chromaticities of both illuminants. The black-body locus and the chromaticity of 6500K

578 illuminant are shown for the comparison purpose.

579

580 For the test field, 8 reflectances were selected from the 180 reflectances and they were

581 used under both illuminant conditions. Then, we sampled different 5 reflectances

582 separately for each illuminant condition. The panel (b) shows 13 chromaticities when

583 rendered under each test illuminant. The 5 data points surrounded by a red edge

584 indicates the 5 reflectances that were not shared between illuminant conditions. In this

585 experiment, the test chromaticities were chosen so that their chromaticities vary along

586 two directions: (i) the black-body locus (shown by circles symbols) and (ii) an axis

587 approximately orthogonal to the black-body locus (shown by triangle symbols). There

588 were 7 chromaticities for each direction, but there was one chromaticity used for both

589 directions (shown by the black square symbol). The chromaticities of natural objects tend

590 to spread along black-body locus, and the purpose of this design was to test whether

591 luminosity thresholds measured at atypical chromaticities would deviate from the

592 prediction of optimal color model or real object model.

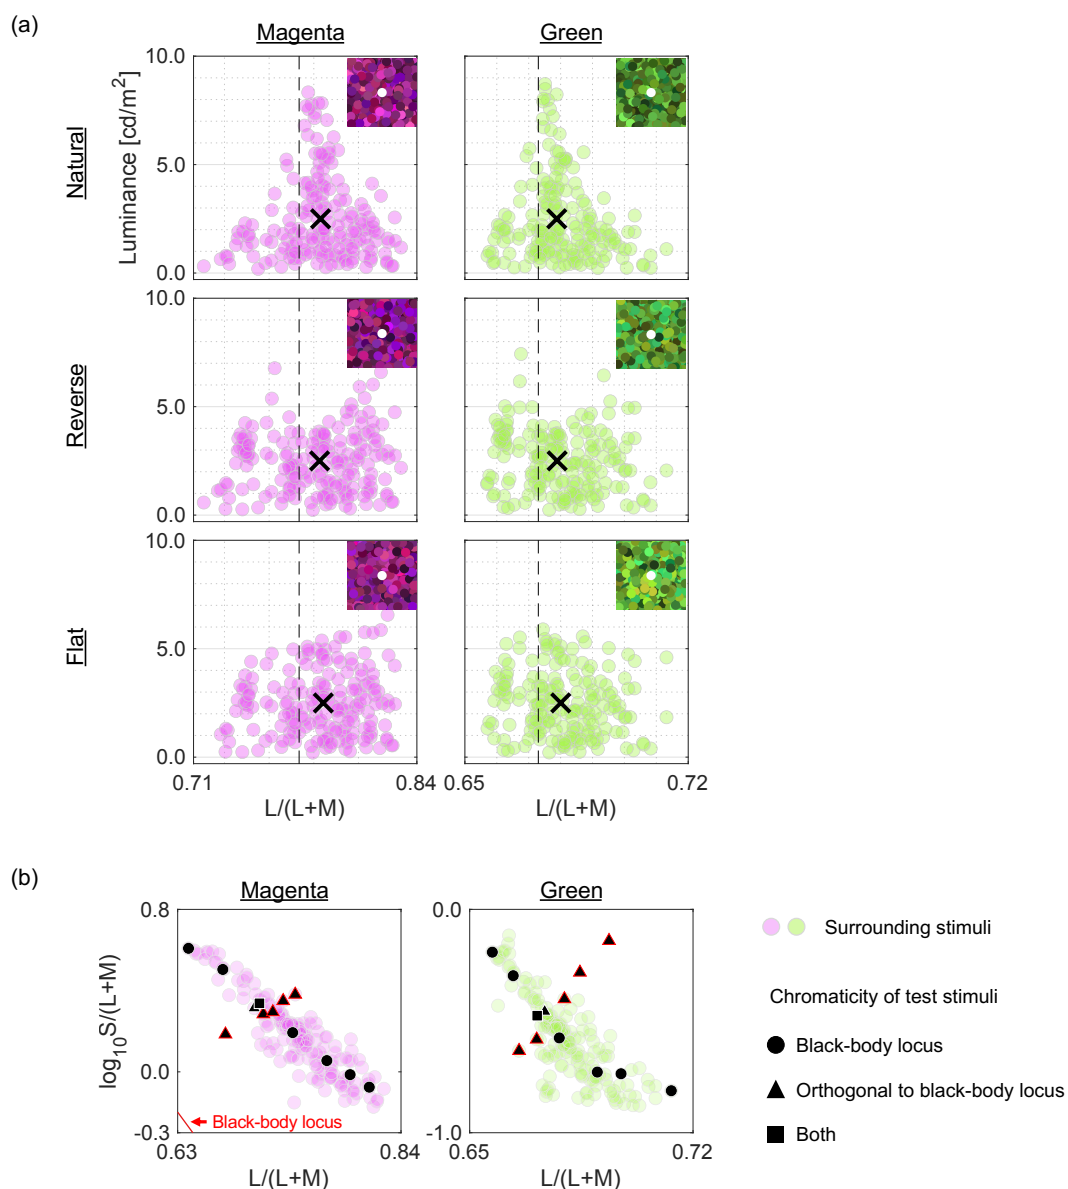

593

594 Figure 12: (a) 6 color distributions for surrounding stimuli (2 test illuminants × 3

595 distributions). Inserted image shows an example stimulus configuration. The vertical

596 dashed black line indicates the L/(L+M) value of test illuminant. Black cross symbols

597 indicate mean cone response values across 180 surrounding stimuli. (b) 13 test

598 chromaticities at which the luminosity threshold was measured. Symbols with a red

599 edge indicates reflectances that were not shared between magenta and green

600 illuminants.



601 **5.2 Procedure**

602 One block consisted of 13 consecutive settings and thresholds were measured for all  
603 test chromaticities in a random order. Each session comprised 6 blocks to test all  
604 distribution  $\times$  illuminant conditions. The order of condition was randomized. All observers  
605 completed 10 sessions in total. Experiments were conducted in two days, and observers  
606 completed 5 sessions per day.

607

608 **5.3 Results**

609 Figure 13 shows results. Left 6 panels show luminosity thresholds measured at  
610 chromaticities on black-body locus (black circles and the square in panel (b), Figure 12)  
611 while right 6 panels indicate thresholds at chromaticities on the orthogonal locus (black  
612 triangles and the square in panel (b), Figure 12).

613

614 We first look at left two columns. For magenta illuminant condition, observers' settings  
615 again show a mountain-like shape. Also, it is shown that settings are not dependent on  
616 surrounding color distribution. However, in this condition optimal color model and real  
617 object model show relatively flat locus. For green illuminant, observer settings appear  
618 flat. Also luminosity thresholds for subject KS show a fairly different trends from the other  
619 observers, and the locus is not well predicted by optimal color locus nor real object locus,  
620 which was not observed in Experiments 1 and 2.

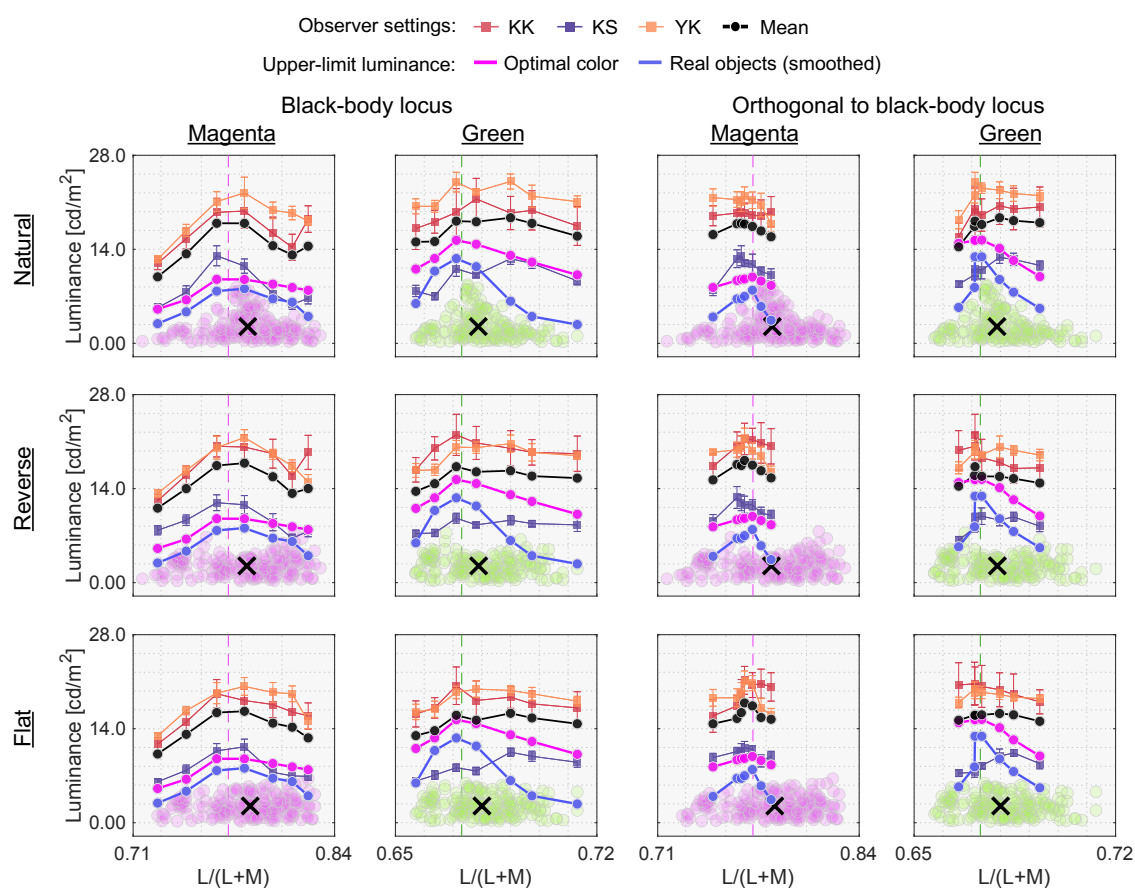

621

622 Figure 13: Observer settings in in Experiment 3. Left two columns indicates luminosity  
 623 thresholds measured at test chromaticities on black-body locus (circle and square  
 624 symbols in panel (b), Figure 12). Right two columns show test chromaticities on the  
 625 locus orthogonal to black-body locus (triangle and square symbols in panel (b), Figure  
 626 12). Colored square symbols indicate averaged setting across 10 repetitions for each  
 627 observer. The error bar indicates  $\pm$  S.E across 10 repetitions. The black circle symbols  
 628 indicate average observer settings ( $n = 3$ ). The magenta circle symbols denote the  
 629 optimal color locus and the blue line shows the real objects locus. The vertical dashed  
 630 line shows the chromaticity of the test illuminant. The black cross symbol indicates  
 631 mean LMS value across surrounding stimuli.

632

633 When the test chromaticities are on the axis orthogonal to the black-body locus (right  
634 two columns), for magenta condition all observers' settings might appear to resemble the  
635 optimal color locus at a first glance. However for green illuminant condition, KS again  
636 shows different trend from other observers and all observers do not agree with the  
637 prediction of the optimal color model nor the real object model.

638

639 Figure 14 allows us to compare the correlation coefficient across models and conditions.  
640 For the leftmost column, the optimal color model showed overall good correlation for  
641 *natural* condition, while the real object model showed good correlation for *reverse* and  
642 *flat* conditions. For *natural* condition, KS shows highest correlation with surrounding color  
643 model, which was not observed in Experiments 1 and 2 in which illuminants on black-  
644 body locus were used as test illuminants. For the second leftmost column, in most cells  
645 correlation coefficients appear considerably low. Although the optimal color model  
646 consistently showed highest correlation for all distribution conditions (average coefficient  
647 across 9 cells is 0.58), the correlation coefficient is not so high if we consider that the  
648 correlation for the optimal color model was 0.901 in Experiment 1 (average across 5  
649 distributions  $\times$  4 observers). Also, in Experiment 2, correlations were 0.746 for the optimal  
650 color model of ground-truth illuminant and 0.837 for estimated illuminant (average across  
651 9 conditions  $\times$  4 observers in both cases).

652

653 For right two columns, for magenta illuminant condition, the trend seems to be close to  
654 that of test chromaticities on black-body locus (leftmost column), but correlation  
655 coefficient overall seems to be lower. For green-natural condition, the closest color  
656 shows a high correlation with observers KK and KS. It is notable that the optimal color

657 model shows nearly zero or even negative correlations. For reverse condition, real  
 658 objects showed the best correlation, but their values are not high (0.577, average across  
 659 3 observers). For flat condition, we did not find a consistently good model.  
 660  
 661

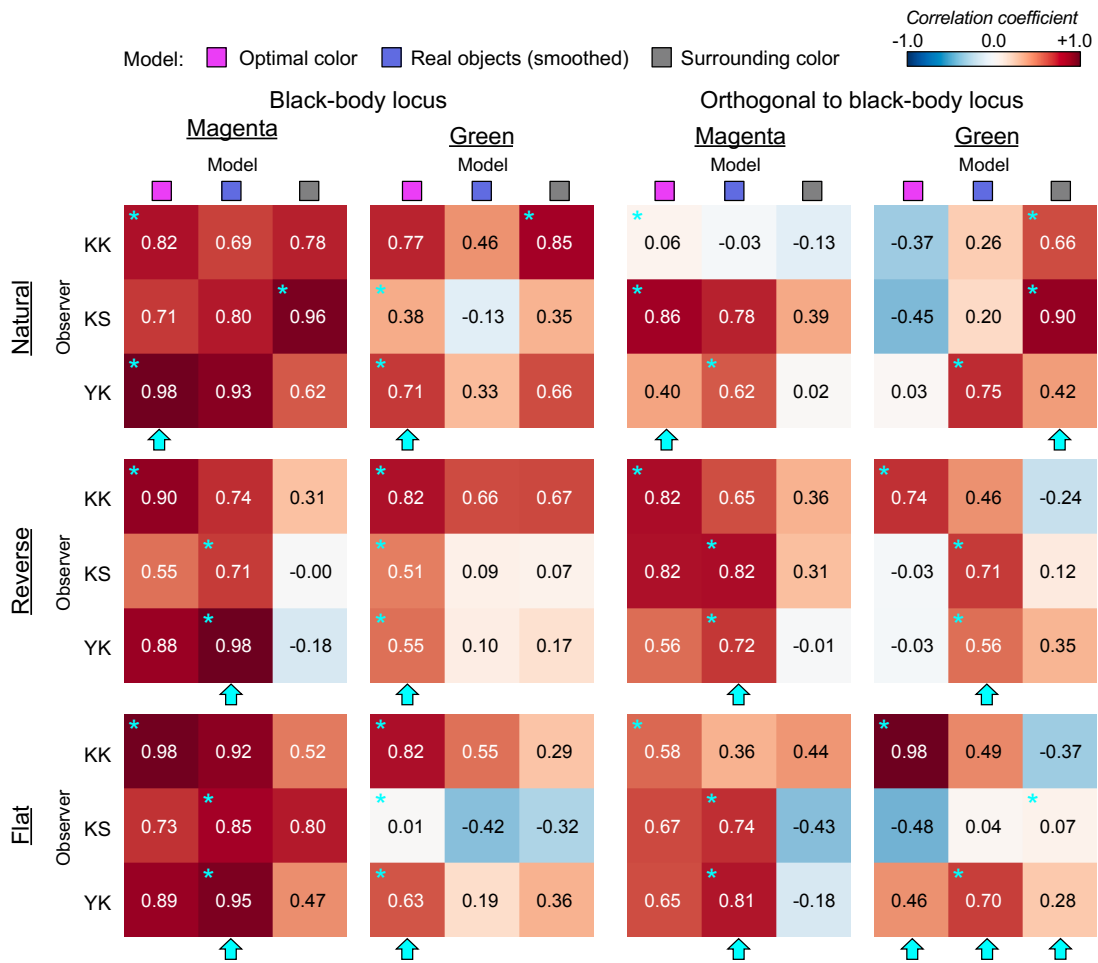

662  
 663 Figure 14: The matrices of Pearson's correlation coefficient calculated between  
 664 observer settings and model prediction over 7 test chromaticities in Experiment 3. The  
 665 cyan star symbol indicates the highest correlation coefficient across 3 models. The  
 666 cyan arrows at the bottom of each subpanel show the model that received the highest  
 667 number of cyan star mark.  
 668

669 In summary these results suggested that although the optimal color model and real  
670 object models can account for observer settings to some extent, overall coefficient values  
671 were substantially lower than those observed in Experiments 1 and 2. Also the  
672 surrounding color model showed good correlation in some cases. These results might  
673 imply that visual system does not have a rigid internal reference about upper-limit  
674 luminance under atypical illuminant and sometimes relies on external cues such as the  
675 color in surrounding stimuli. This trend was particularly true when the test chromaticities  
676 are sampled from the locus orthogonal to black-body locus.

677

678 Finally, we summarize correlation coefficient from three experiments to test whether  
679 correlation coefficient of optimal color model is higher for typical illuminants (Experiments  
680 1 and 2) than atypical illuminants (Experiment 3). For each observer, we averaged  
681 correlation coefficient of optimal color model for all conditions in Experiment 1 and 2 (14  
682 conditions), which serves as a summary statistic for a typical illuminant. For 20000K  
683 condition in Experiment 2, we used correlation coefficient value of the optimal color  
684 model under estimated illuminant as it predicted observer settings substantially better  
685 than the model under the ground-truth illuminant. We also calculated average correlation  
686 coefficient for all conditions in Experiment 3 (8 conditions). Then, the averaged  
687 correlation coefficients across all observers were  $0.879 \pm 0.0114$  (average  $\pm$  S.D.) for  
688 typical illuminant and  $0.525 \pm 0.155$  for atypical illuminant. Welch's t-test (one-tailed, no  
689 assumption about equal variance) showed that optimal color model has a significantly  
690 higher correlation for typical illuminant than atypical illuminant ( $t(2.01) = 3.94$ ,  $p = 0.0290$ ).  
691 Also we performed the same analysis using correlation coefficient for the real object  
692 model which showed the same trend ( $t(2.84) = 2.93$ ,  $p = 0.0326$ ).

693

694 These results are consistent with the idea that human observers empirically learn the  
695 upper-limit luminance through observing colors in natural environments and use the  
696 criterion to judge whether a given surface is self-luminous or not. Since magenta and  
697 green illuminants are uncommon in natural environments, the visual system does not  
698 know the upper limit of surface colors under those illuminants. This interpretation may  
699 explain why prediction from optimal color model and real objects model did not well  
700 explain observers' luminosity thresholds in Experiment 3.

701

## 702 **5. General Discussion**

703 This study investigated potential determinants of luminosity thresholds. Three  
704 experiments showed that loci of luminosity thresholds are mountain-like shape peaking  
705 around the illuminant color and decreases as stimulus purity increases, which showed a  
706 strikingly similarity to the optimal color and real object loci. A simple alternative strategy  
707 which bases a judgement on a surrounding color distribution did not explain observers'  
708 settings well. Rather observers seem to hold an internal representation about at what  
709 luminance a surface should reach self-luminous. Moreover, such similarity between  
710 luminosity threshold and optimal-color/real-object loci was higher when surfaces are  
711 placed under illuminants along blue-yellow direction than magenta and green illuminants  
712 that are atypical in natural environments. These support an idea that visual system  
713 empirically internalizes the heuristic gamut of surface colors through an observation of  
714 colors in a daily life. Going back to the original question whether visual system relies on  
715 external or internal reference for luminous judgement, the present study strongly  
716 supports an internal reference hypothesis. However, in Experiment 2, the peak of the loci

717 of luminosity thresholds were strongly influence by the color temperature of illuminant  
718 lighting surrounding stimuli. Thus, though the surrounding color model implemented in  
719 this study did not explain observers' settings well, it should be noted that properties of  
720 external stimuli are also likely to influence luminosity thresholds.

721

722 Color constancy is often described as a visual ability to identify a surface under different  
723 illuminants. A surface reflects a light, and the reflected light enters our eyes. Because  
724 the reflected light is a product of surface and illuminant components, color constancy is  
725 often framed as a process in which our visual system estimates the influence of illuminant.  
726 The "brightest is white" heuristics, which assumes that a surface with the highest  
727 luminance provides the closest information about the illuminant color, has been known  
728 as an influential approach to estimate an illuminant color (Land, 1977). However, self-  
729 luminous objects do not carry information about scene illuminant, which might cause an  
730 misestimation of illuminant if included in a scene. In general, when we received an  
731 intense light from a surface, there are two ways to interpret this. One is that the surface  
732 is placed under an intense illuminant and the other is that the surface is self-luminous.  
733 This example highlights that generation of luminous percept needs to be incorporated  
734 into a process of color constancy. In fact, Fukuda & Uchikawa (2014) showed that a  
735 surface appearing in aperture-color mode does not have a strong influence on observers'  
736 estimates of illuminant.

737

738 We chose a set of colored circles as experimental stimuli to directly test our hypothesis  
739 while excluding any other cues. However, it is reported that changing a material property  
740 could affect the mode of color appearance (Kuriki, 2015). Also, our experimental stimuli

741 were simulated to be uniformly illuminated by a single illuminant, but in natural  
742 environments the spectra hitting an object surface changes from one direction to another  
743 (Morimoto et al., 2019). The presence of multiple illuminants means that we need to  
744 consider multiple optimal color distributions, and thus loci of luminosity thresholds  
745 measured under such environment might also change. Despite a growing amount of  
746 research on material perception (Fleming, 2013), luminous perception is little studied in  
747 the field. While our choice of stimuli was necessary for experimental control, it will be  
748 interesting whether our finding applied a wider range of stimuli that have complex  
749 material properties and are illuminated in non-uniform ways.

750

751 One closely related phenomenon to self-luminous perception would be brightness  
752 perception of colored objects. The Helmholtz-Kohlrausch effect describes that stimuli  
753 with high purity appear to have high brightness even if luminance was kept the same.  
754 There are reports that the effect is observed under a variety of viewing conditions  
755 (Nayatani et al., 1991; Donofrio, 2011). However it has been uncertain why a color with  
756 high purity needs to appear brighter. Curiously, as observed in the present study the  
757 same trends hold for luminosity thresholds, a surface with high purity reaches the limit  
758 of surface color mode at lower luminance level. Thus, if we take a strategy to determine  
759 the brightness of colored stimuli in comparison to the theoretical upper-limit luminance  
760 at the chromaticity we could account for why the Helmholtz-Kohlrausch effect exists.  
761 Uchikawa et al. (2001) directly focused on this relationship and argued that saturated  
762 colors appear brighter because visual system knows that it has a lower limit and  
763 brightness might be determined in proportion to the theoretical upper-limit luminance.

764



765 Identifying the range of natural colors has been one major focus especially in the field of  
766 color science (Pointer, 1980). While the limit of chromaticity has been well characterized,  
767 little is known regarding the luminance limit. In this study, we used SOCS reflectance  
768 dataset as a reference to draw an upper-luminance boundary for real objects. The  
769 database covers a wide range of color space as it includes man-made materials such as  
770 ink which can have narrow-band reflectances. We do not intend to claim that SOCS  
771 dataset in any sense represents all plausible natural reflectance spectra. Yet, our  
772 separate analysis based on 16 hyperspectral images (Nascimento, 2002, Foster 2006)  
773 showed that colors in those images were mostly covered in the gamut of SOCS dataset.  
774 Also, to our knowledge we have not encountered other dataset that has a larger color  
775 gamut than SOCS dataset. We also found that if we restrict samples to natural objects,  
776 the color gamut largely shrinks (see Figure 2 (b) in Morimoto 2016) and upper-limit  
777 luminance estimated from such sample would not predict obtained luminosity thresholds  
778 in this study. Also, in this study, we used a smoothed upper-limit luminance. If we instead  
779 use a raw unsmoothed data, the correlation coefficient lowered in almost all tested  
780 conditions. These results show that a precise evaluation of the abundance of reflectance  
781 samples in real world seems to play a key role in understanding the luminosity percept.  
782 When more reflectance datasets become available in future, the gamut of real objects  
783 should be re-evaluated.

784

785 In summary, our results suggested that there is a mysterious relationship between  
786 luminosity threshold and optimal colors. Yet it is difficult to make a conclusive statement  
787 as to whether the optimal color model is better in accounting for luminosity thresholds  
788 than real object model. This is partially because the optimal color locus well resembles

789 the locus of real objects, leading to high correlation between predictions from two models.  
790 Furthermore, an intrinsically more challenging question would be that how our visual  
791 system learns the optimal color locus even though optimal colors do not exist in the real  
792 world. Considering this point, one plausible theory would be that our visual system  
793 empirically learns natural color distributions through seeing colors in a daily life and  
794 develops the heuristic gamut of surface colors. Then, a given surface appears self-  
795 luminous when its luminance exceeds this heuristic upper-limit luminance. As argued  
796 above, SOCS dataset does not fully represent all real reflectance that can exist, and it is  
797 possible that the real gamut is larger than our estimation. As we have more surfaces, the  
798 gamut of surface color expands, and in theory it will eventually converge to the optimal  
799 color distribution. There is a report that Japanese monkeys (*Macaca fuscata*) raised only  
800 under monochromatic light do not develop color constancy (Sugita, 2004). Our current  
801 study also presents a potential link between our perceptual judgment and importance of  
802 learning natural scene statistics available in the real world.

803

#### 804 **Supplementary Material**

805 Figure S1 shows individual observer settings in Experiment 2. There are some individual  
806 variations but overall trend was similar across individuals.

807

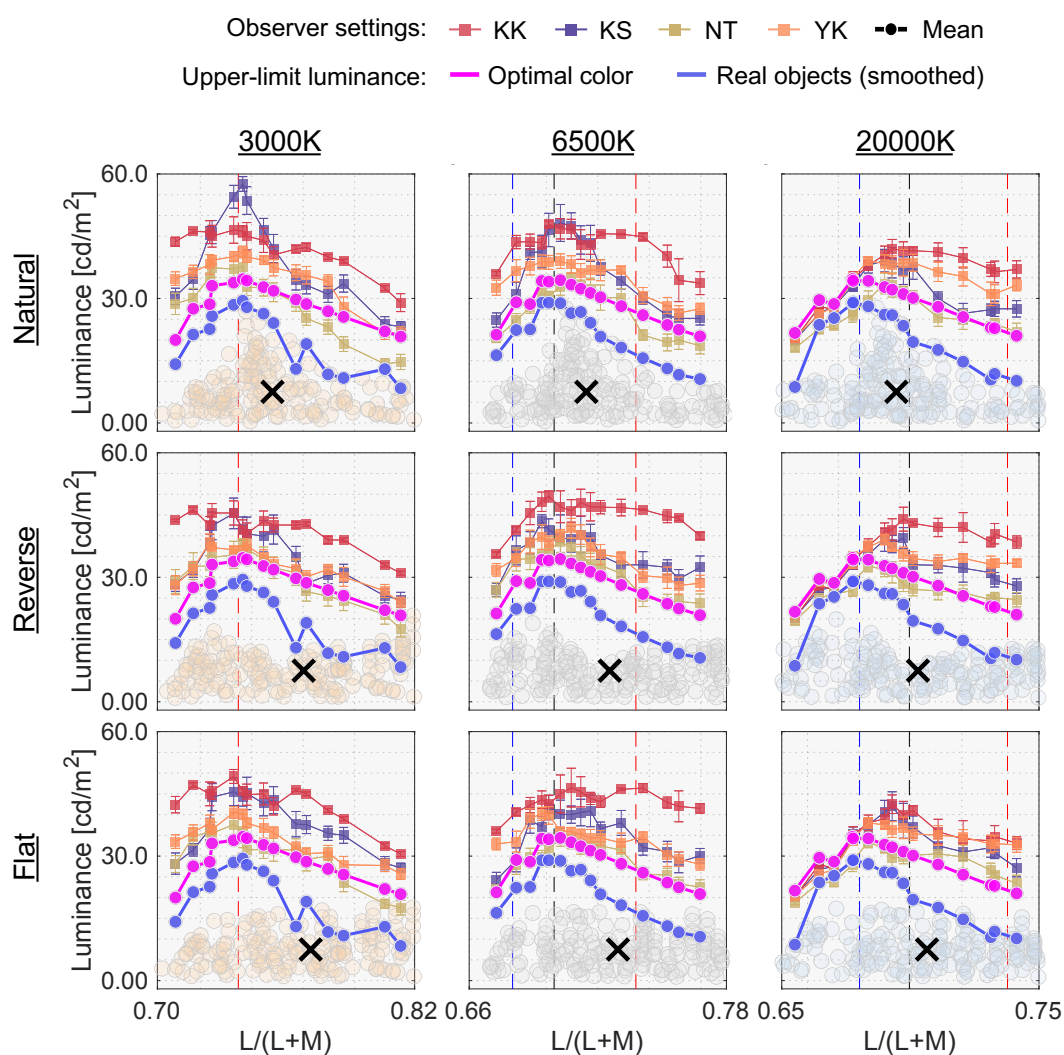

808

809 Figure S1: Individual observer settings in Experiment 2. Colored square symbols indicate  
 810 averaged setting across 10 repetitions for each observer. The error bar indicates  $\pm$  S.E  
 811 across 10 repetitions. The magenta circle symbols denote the optimal color locus and  
 812 the blue line shows the real objects locus. The vertical dashed line shows the  
 813 chromaticity of the test illuminant. The black cross symbol indicates mean LMS value  
 814 across surrounding stimuli. Notice that the horizontal range differs across panels.

815

### 816 **Acknowledgement**

817 This work was supported by JSPS KAKENHI Grant Number JP19K22881, JP17K04503  
 818 and 26780413. TM is supported by a Sir Henry Wellcome Postdoctoral Fellowship  
 819 awarded from the Wellcome Trust (218657/Z/19/Z) and Junior Research Fellowship from  
 820 Pembroke College, University of Oxford.

821

822 **Data access**

823 The raw experimental data will be available at a data repository. Codes to reproduce  
824 figures will be available at <https://github.com/takuma929> at the time of publication.

825

826 **Reference**

827 Bonato F, Gilchrist AL. (1994). The Perception of Luminosity on Different Backgrounds  
828 and in Different Illuminations. *Perception*. 23, 9, 991-1006.

829 Bonato, F., Gilchrist, A.L. (1999). Perceived area and the luminosity threshold.  
830 *Perception & Psychophysics*, 61, 786–797.

831 Brainard. D. H. (1998). Color constancy in the nearly natural image 2 Achromatic loci.  
832 *Journal of the Optical Society of America A*, 15, 2, 307–325.

833 Brown, R. Background and illuminants: the yin and yang of colour constancy. in *Colour*  
834 *Perception: Mind and the Physical World*, R. Mausfeld and D. Heyer, eds. (Oxford  
835 University, 2003), 247–272.

836 Buchsbaum, G. (1980). A spatial processor model for object colour perception. *Journal*  
837 *of the Franklin Institute*, 310, 1, 1–26.

838 Donofrio, R.L. (2011). Review Paper: The Helmholtz-Kohlrausch effect. *Journal of the*  
839 *Society for Information Display*, 19, 658-664.

840 Evans, R. M. (1959). Fluorescence and Gray Content of Surface Colors. *J. Opt. Soc. Am.*  
841 49, 1049-1059

842 Evans, R. M. & Swenholt, B. K. (1967). Chromatic strength of colors: dominant  
843 wavelength and purity. *J. Opt. Soc. Am.* 58, 580-584. *J. Opt. Soc. Am.* 58, 580-584.

844 Evans, R. M. & Swenholt, B. K. (1968). Chromatic Strengths of Colors, Part II. The  
845 Munsell System. *J. Opt. Soc. Am.* 58, 580-584.

846 Evans, R. M. & Swenholt, B. K. (1969). Chromatic Strength of Colors, III. Chromatic  
847 Surrounds and Discussion. *J. Opt. Soc. Am.* 59, 628-634.

848 Fleming, R. W. (2013). Material Perception. *Annual Review of Vision Science*, 3, 365–  
849 388.

850 Fukuda, K. & Uchikawa, K. (2014). Color constancy in a scene with bright colors that do  
851 not have a fully natural surface appearance. *Journal of the Optical Society of America*  
852 *A*, 31, 4, A239–A246.

853 Gilchrist, A. & Bonato, F. (1995). Anchoring of lightness values in center-surround  
854 displays. *Journal of Experimental Psychology: Human Perception and Performance*,  
855 21, 6, 1427-1440.

- 856 Gilchrist, A., Kossyfidis, C., Bonato, F., Agostini, T., Cataliotti, J., Li, X., Spehar, B., Annan,  
857 V. & Economou, E. (1999). An anchoring theory of lightness perception. *Psychological*  
858 *Review*, 106, 795–834.
- 859 Judd, D. B., MacAdam, D. L. Wyszecki, G., Budde, H. W., Condit, H. R., Henderson S.  
860 T., and Simonds J. L. (1964) “Spectral distribution of typical daylight as a function of  
861 correlated color temperature,” *J. Opt. Soc. Am.* 54(8), 1031–1040
- 862 Kuriki, I. (2015) Effect of material perception on mode of color appearance. *Journal of*  
863 *Vision*, 15(8), 4.
- 864 Krinov, E. (1947) Spectral reflectance properties of natural formations. Tech. rep.,  
865 National Research Council of Canada. Technical Translation: TT-439.
- 866 Land, E. H. (1977). The Retinex Theory of Color Vision, *Scientific American*, 237, 6, 108  
867 -128.
- 868 Long, F., & Purves, D. (2003) Natural scene statistics as the universal basis of color  
869 context effects. *Proceedings of the National Academy of Sciences*, 100, 25, 15190-  
870 15193.
- 871 Lotto, R. B. & Purves, D. (2000) An empirical explanation of color contrast. *Proceedings*  
872 *of the National Academy of Sciences*, 97, 23, 12834-12839.
- 873 MacAdam, D. (1935a). The theory of the maximum visual efficiency of colored materials.  
874 *Journal of the Optical Society of America A*, 25, 249–252.
- 875 MacAdam, D. (1935b). Maximum visual efficiency of colored materials. *Journal of the*  
876 *Optical Society of America A*, 25, 361–367.
- 877 MacLeod, D. I. A., & Boynton, R. M. (1979) Chromaticity diagram showing cone  
878 excitation by stimuli of equal luminance. *Journal of the Optical Society of America A*,  
879 69, 1183–1186.
- 880 Maloney, L. T. & Wandell, B. A. (1986) Color constancy: a method for recovering surface  
881 spectral reflectance *Journal of the Optical Society of America A*, 3, 1, 29–33.
- 882 Morimoto, T., Fukuda, K., & Uchikawa, K. (2016) “Effects of surrounding stimulus  
883 properties on color constancy based on luminance balance”, *Journal of the Optical*  
884 *Society of America A*, 33, 3, A214–A227.
- 885 Morimoto, T., Kishigami, S., Linhares, J. M. M., Nascimento, S. M. C., & Smithson, H. E.  
886 (2019). Hyperspectral environmental illumination maps: characterizing directional  
887 spectral variation in natural environments. *Optics Express*, 27, 32277-32293.
- 888 Morimoto, T., Kishigami, S., Linhares, J. M. M., Nascimento, S. M. C., & Smithson, H. E.  
889 (2021). Human color constancy based on the geometry of color distributions. *Journal of*  
890 *Vision*, 27, 21(3):7. doi: <https://doi.org/10.1167/jov.21.3.7>.
- 891 Nascimento, S.M.C., Ferreira, F.P., & Foster, D.H. (2002). Statistics of spatial cone-

- 892       excitation ratios in natural scenes. *Journal of the Optical Society of America A*, 19,  
893       1484-1490.
- 894       Foster, D.H., Amano, K., Nascimento, S.M.C., & Foster, M.J. (2006). Frequency of  
895       metamerism in natural scenes. *Journal of the Optical Society of America A*, 23, 2359-  
896       2372.
- 897       Nayatani Y., Umemura, Y., Sobagaki, H., Takahama, K. & Hashimoto, K. (1991).  
898       Lightness perception of chromatic object colors. *Color research and application*, 16, 1.
- 899       Pointer, M. R. (1980) The gamut of real surface colours. *Col. Res. Appl.* 5, 145–155.
- 900       Speigle, J. M. & Brainard, D. H. (1996). Luminosity thresholds: effects of test chromaticity  
901       and ambient illumination. *Journal of the Optical Society of America A*, 13, 436-451
- 902       Stockman, A. and Sharpe, L. T. (2000) The spectral sensitivities of the middle- and long-  
903       wavelength-sensitive cones derived from measurements in observers of known  
904       genotype. *Vision Research*, 40, 1711–1737.
- 905       Sugita, Y. (2004). Experience in Early Infancy Is Indispensable for Color Perception.  
906       *Current Biology*, 14, 3, 1267- 1271.
- 907       Uchikawa, K., Koida, K., Meguro, T., Yamauchi Y., & Kuriki, I. (2001). Brightness, not  
908       luminance, determines transition from the surface-color to the aperture-color mode for  
909       colored lights. *Journal of the Optical Society of America A*, 18, 737–746.
- 910       Uchikawa, H., Uchikawa, H. & Boynton, R. M. (1989). Influence of achromatic surrounds  
911       on categorical perception of surface colors. *Journal of the Optical Society of America*  
912       *A*, 29, 7, 881–890.
- 913       Uchikawa, K., Fukuda, K., Kitazawa, Y., & MacLeod, D. I. A. (2012). Estimating illuminant  
914       color based on luminance balance of surfaces. *Journal of the Optical Society of*  
915       *America A*, 29, 2, A133–A143.
- 916       Ullman, S. (1976) On visual detection of light sources. *Biological Cybernetics*, 21, 205–  
917       211.
- 918       Yamauchi, Y. & Uchikawa, K. (2005). Depth information affects judgment of the surface-  
919       color mode appearance. *Journal of Vision*, 5, 515-524.
- 920
